# Supplementary material for: Biogenic synthesis of a Ag–graphene nanocomposite with efficient photocatalytic degradation, electrical conductivity and photoelectrochemical performance
Source: Royal Society of Chemistry journal article supplement (doi:10.1039/c5nj01320h), 2015-01-01
Supplement: c5nj01320h1.pdf [file c5nj01320h1.pdf]

## Electronic Supplementary Information

# Biogenic synthesis of a Ag–graphene nanocomposite with efficient photocatalytic degradation, electrical conductivity and photoelectrochemical performance†

Mohammad Ehtisham Khan<sup>1</sup>, Mohammad Mansoob Khan<sup>2\*</sup>, and Moo Hwan Cho<sup>1\*</sup>

<sup>1</sup>*School of Chemical Engineering, Yeungnam University, Gyeongsan-si, Gyeongbuk 712-749, South Korea. Phone: +82-53-810-2517, Fax: +82-53- 810-4631.*

<sup>2</sup>*Chemical Sciences, Faculty of Science, Universiti Brunei Darussalam, Jalan Tungku Link, BE1410, Brunei Darussalam*

*\*Email: mhcho@ynu.ac.kr, and mmansoobkhan@yahoo.com*

### Stability test of Ag-Graphene nanocomposite

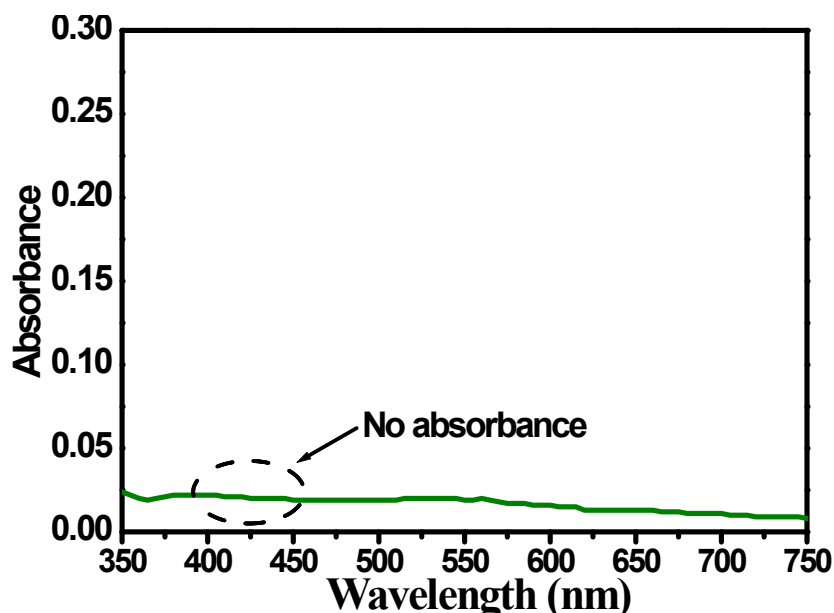

Fig. S1. Stability test of Ag-Graphene nanocomposite.

## Reusability test of MB and CR using Ag-Graphene nanocomposite

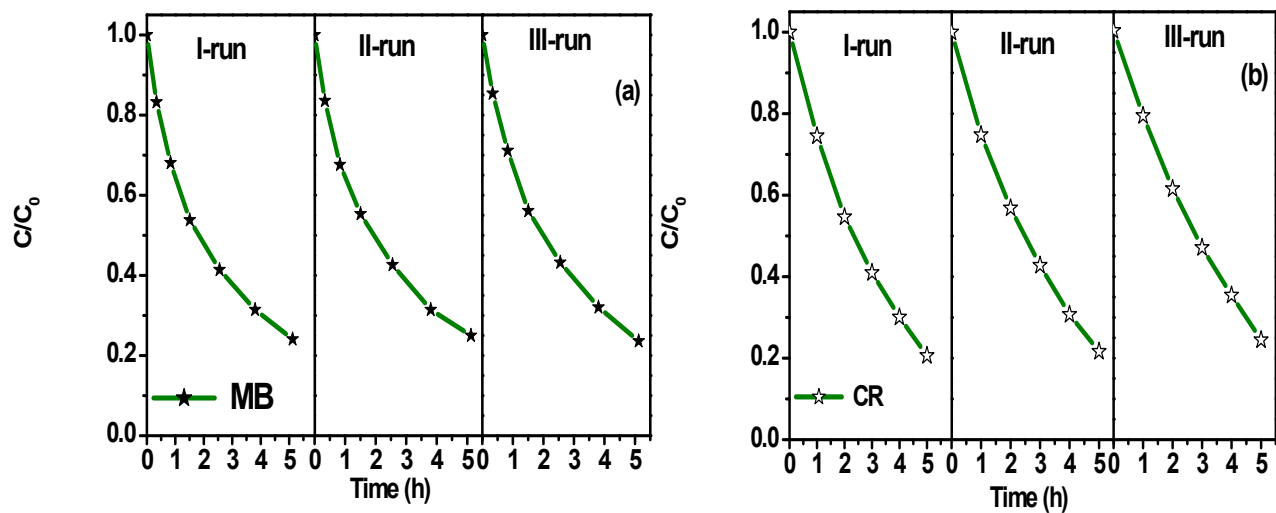

**Fig. S2.** Reusability test of MB and CR using Ag-Graphene nanocomposite.

### EDS spectrum of Ag-Graphene nanocomposite

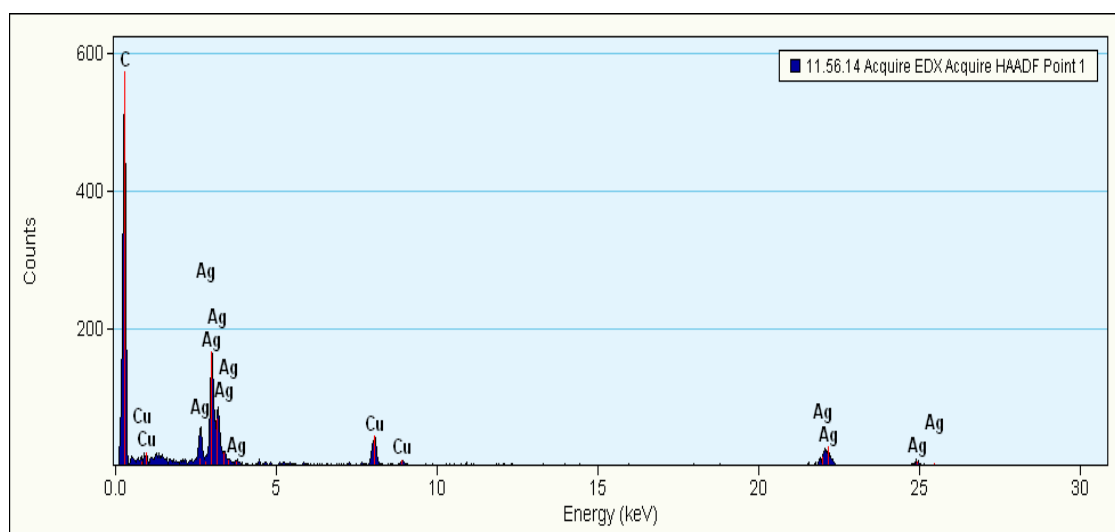

**Fig. S3.** EDS spectrum of Ag-Graphene nanocomposite.
